# Supplementary material
Source: PubMed Central journal article supplement (PMC5346159)
Supplement: NIHMS853089-supplement-supplemental.pdf [file NIHMS853089-supplement-supplemental.pdf]

## Supplementary Materials for

### **Circulating tumor DNA analysis detects minimal residual disease and predicts recurrence in patients with stage II colon cancer**

Jeanne Tie,\* Yuxuan Wang, Cristian Tomasetti, Lu Li, Simeon Springer, Isaac Kinde, Natalie Silliman, Mark Tacey, Hui-Li Wong, Michael Christie, Suzanne Kosmider, Iain Skinner, Rachel Wong, Malcolm Steel, Ben Tran, Jayesh Desai, Ian Jones, Andrew Haydon, Theresa Hayes, Tim J. Price, Robert L. Strausberg, Luis A. Diaz Jr., Nickolas Papadopoulos, Kenneth W. Kinzler, Bert Vogelstein,\* Peter Gibbs\*

\*Corresponding author. Email: [jeanne.tie@mh.org.au](mailto:jeanne.tie@mh.org.au) (J.T.); [vogelbe@jhmi.edu](mailto:vogelbe@jhmi.edu) (B.V.); [peter.gibbs@mh.org.au](mailto:peter.gibbs@mh.org.au) (P.G.)

Published 6 July 2016, *Sci. Transl. Med.* **8**, 346ra92 (2016)  
DOI: 10.1126/scitranslmed.aaf6219

#### **This PDF file includes:**

- Fig. S1. Recurrence-free survival in patients not treated with adjuvant chemotherapy stratified by postoperative CEA status.
- Table S1. Relationship between postoperative ctDNA, postoperative CEA, and recurrence status for patients not treated with chemotherapy.
- Table S2. Time-dependent predictive accuracy of postoperative ctDNA for recurrence at 5, 6, 12, 18, 24, 36, and 40 months.
- Table S3. Serial circulating biomarker status and clinical characteristics of patients not treated with adjuvant chemotherapy who experienced recurrence.
- Table S4. Serial circulating biomarker status and clinical characteristics of chemotherapy-treated patients who experienced recurrence.
- Table S5. Genomic and clinical summary for all patients included in the final evaluable population.
- Table S6. Panel of 15 genes used for identification of somatic mutations in tumor tissue.

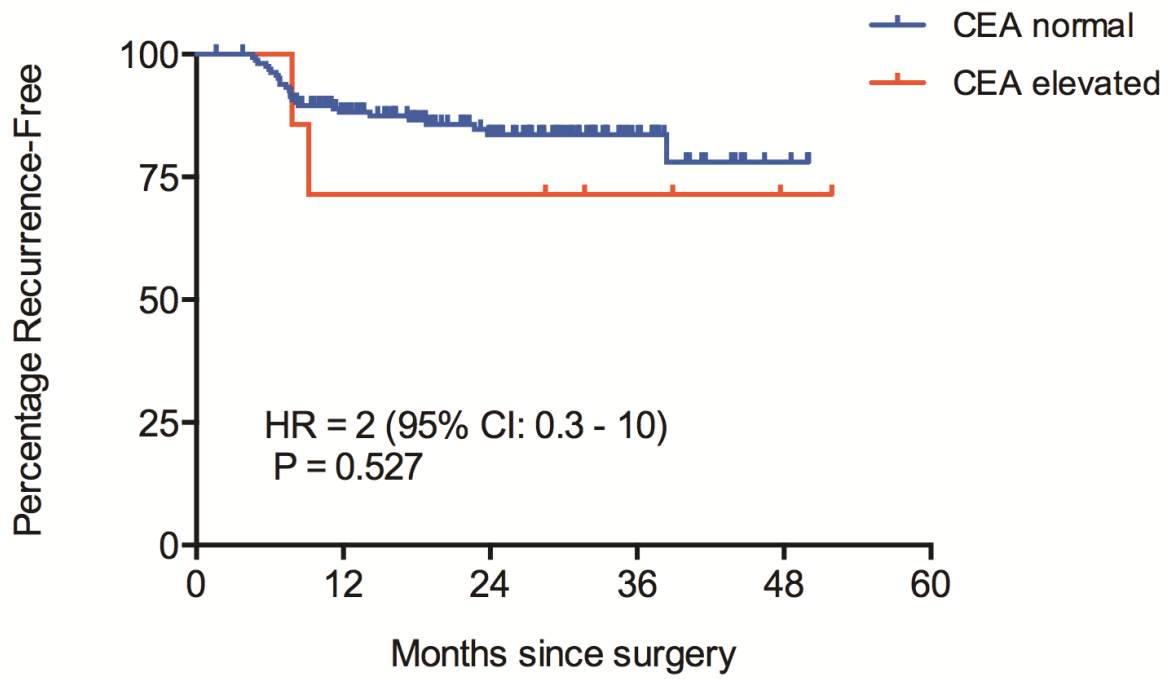

Figure S1. Recurrence-free survival in patients not treated with adjuvant chemotherapy stratified by postoperative CEA status.

**Table S1. Relationship between postoperative ctDNA, postoperative CEA, and recurrence status for patients not treated with chemotherapy**

|                                                   | <b>Recurrence</b> | <b>No recurrence*</b> |
|---------------------------------------------------|-------------------|-----------------------|
| <b>Post-op ctDNA positive – no./total no. (%)</b> |                   |                       |
| CEA elevated                                      | 0/11 (0)          | 0/3 (0)               |
| CEA not elevated                                  | 11/11 (100)       | 3/3 (100)             |
| <b>Post-op ctDNA negative – no./total no. (%)</b> |                   |                       |
| CEA elevated                                      | 2/16 (13)         | 5/142 (4)             |
| CEA not elevated                                  | 14/16 (87)        | 137/142 (96)          |

\*Post-op CEA data not available in 6 cases

**Table S2. Time-dependent predictive accuracy of postoperative ctDNA for recurrence at 5, 6, 12, 18, 24, 36, and 40 months.** Time-dependent ROC analysis performed with the *R* package *survival ROC* (version 1.0.3).

| <b>Time (months)</b> | <b>Sample Size</b> | <b>Sensitivity</b> | <b>Specificity</b> |
|----------------------|--------------------|--------------------|--------------------|
| 5                    | 178                | 0.99               | 0.93               |
| 6                    | 178                | 0.59               | 0.94               |
| 12                   | 178                | 0.43               | 0.97               |
| 18                   | 178                | 0.45               | 0.98               |
| 24                   | 178                | 0.48               | 1.00               |
| 36                   | 178                | 0.48               | 1.00               |
| 40                   | 178                | 0.37               | 1.00               |

**Table S3. Serial circulating biomarker status and clinical characteristics of patients not treated with adjuvant chemotherapy who experienced recurrence.**

| Patient ID           | Post-op ctDNA Status | ctDNA status up to the time of recurrence | Time from ctDNA detection to recurrence (days) | Post-op CEA status | CEA status up to the time of recurrence | Site(s) of Recurrence                 | Resectable recurrence |
|----------------------|----------------------|-------------------------------------------|------------------------------------------------|--------------------|-----------------------------------------|---------------------------------------|-----------------------|
| LCR 030              | Positive             | Positive                                  | 115                                            | Not elevated       | Elevated                                | Liver only mets                       | yes                   |
| LCR 153              | Positive             | Positive                                  | 641                                            | Not elevated       | Not elevated                            | Anastomotic recurrence                | yes                   |
| LCR 196              | Positive             | Positive                                  | 175                                            | Not elevated       | Not elevated                            | Multiple lung mets                    | no                    |
| LCR 236              | Positive             | Positive                                  | 167                                            | Not elevated       | Not elevated                            | Liver only mets                       | yes                   |
| LCR 237              | Positive             | Positive                                  | 168                                            | Not elevated       | Elevated                                | Multiple disease sites                | no                    |
| LCR 332*             | Positive             | Positive                                  | 279                                            | Not elevated       | Not elevated                            | Liver only mets                       | yes                   |
| LCR 394              | Positive             | Positive                                  | 136                                            | Not elevated       | Not elevated                            | Liver only mets                       | yes                   |
| LCR 398*             | Positive             | Positive                                  | 210                                            | Not elevated       | Elevated                                | Distant lymph nodes                   | no                    |
| LCR 431              | Positive             | Positive                                  | 99                                             | Not elevated       | Not elevated                            | Liver only mets                       | yes                   |
| LCR 495 <sup>†</sup> | Positive             | Positive                                  | 181                                            | Not elevated       | Not elevated                            | Lung mets                             | no                    |
| LCR 507 <sup>†</sup> | Positive             | Positive                                  | 381                                            | Not elevated       | Not elevated                            | Solitary liver met                    | yes                   |
| LCR 051              | Negative             | Positive                                  | 22                                             | Not elevated       | Not elevated                            | 1 lung met only                       | yes                   |
| LCR 056              | Negative             | Positive                                  | 616                                            | Not elevated       | Elevated                                | Liver mets only                       | yes                   |
| LCR 062              | Negative             | Positive                                  | 81                                             | Not elevated       | Elevated                                | Extensive abdominal disease           | no                    |
| LCR 137              | Negative             | Positive                                  | 11                                             | Elevated           | Elevated                                | Loco-regional recurrence              | no                    |
| LCR 138              | Negative             | Positive                                  | 113                                            | Not elevated       | Not elevated                            | Liver met only                        | yes                   |
| LCR 235              | Negative             | Positive                                  | 92                                             | Not elevated       | Not elevated                            | Local recurrence, possible peritoneal | no                    |
| LCR 346              | Negative             | Positive                                  | 35                                             | Not elevated       | Elevated                                | Regional nodal recurrence             | no                    |
| LCR 423              | Negative             | Positive                                  | 0                                              | Elevated           | Elevated                                | Multiple disease sites                | no                    |
| LCR 353              | Negative             | Negative                                  | Not detected                                   | Not elevated       | Elevated                                | Anastomotic recurrence                | yes                   |

\*Serial blood samples not available; <sup>†</sup>LCR 495 and 507 received less than 4 weeks of adjuvant chemotherapy because of toxicity

**Table S4. Serial circulating biomarker status and clinical characteristics of chemotherapy-treated patients who experienced recurrence.**

| <b>Patient #</b> | <b>Post-op ctDNA Status</b> | <b>Post-Chemo ctDNA Status</b> | <b>ctDNA status up to the time of recurrence</b> | <b>Time from ctDNA detection to recurrence (days)</b> | <b>Post-op CEA status</b> | <b>CEA status up to the time of recurrence</b> | <b>Site(s) of recurrence</b> | <b>Resectable recurrence</b> |
|------------------|-----------------------------|--------------------------------|--------------------------------------------------|-------------------------------------------------------|---------------------------|------------------------------------------------|------------------------------|------------------------------|
| LCR 325          | Positive                    | Positive                       | Positive                                         | 343                                                   | Not elevated              | Not elevated                                   | Liver only                   | yes                          |
| LCR 409          | Positive                    | Positive                       | Positive                                         | 472                                                   | Not elevated              | Not elevated                                   | Liver only                   | yes                          |
| LCR 148          | Positive                    | Negative                       | Negative                                         | Not detected                                          | Elevated                  | Elevated                                       | Liver only                   | yes                          |
| LCR 198          | Negative                    | Negative                       | Positive                                         | 266                                                   | Not elevated              | Not elevated                                   | Submucosal rectal deposit    | yes                          |
| LCR 207          | Negative                    | Negative                       | Negative                                         | Not detected                                          | Not elevated              | Not elevated                                   | Isolated lung lesion         | yes                          |
| LCR 224          | Negative                    | Negative                       | Positive                                         | 0                                                     | Not elevated              | Not elevated                                   | Anastomotic recurrence       | yes                          |
| LCR 415          | Negative                    | Negative                       | Negative                                         | Not detected                                          | Elevated                  | Elevated                                       | Mesenteric nodal mass        | no                           |

**Table S5: Genomic and clinical summary for all patients included in the final evaluable population.**

| Patient ID | Adj chemo | Clinical risk group | Time to recurrence or last follow-up from surgery (mths) | Recurrence | Site of recurrence | Mutations identified in tumor tissue                                                 | Mutation identified in tumor tissue used for plasma analysis | Post-op sample - ng DNA recovered from 10mL-plasma | Post-op sample mutant allele fraction (%) | Post-op ctDNA status | Post-chemo ctDNA status | Recurrent cases - serial ctDNA status up to time of recurrence | Time from ctDNA detection to recurrence (days) | Post-op CEA elevated? | Post-op CEA level (µg/L) |
|------------|-----------|---------------------|----------------------------------------------------------|------------|--------------------|--------------------------------------------------------------------------------------|--------------------------------------------------------------|----------------------------------------------------|-------------------------------------------|----------------------|-------------------------|----------------------------------------------------------------|------------------------------------------------|-----------------------|--------------------------|
| LCR 021    | No        | Low                 | 51.9                                                     | No         |                    | <i>TP53</i> p.R175H                                                                  | <i>TP53</i> p.R175H                                          | 130                                                | Not detected                              | Negative             | .                       | .                                                              | .                                              | Yes                   | 7.3                      |
| LCR 022    | No        | Low                 | 48.6                                                     | No         |                    | <i>PIK3CA</i> p.E545K                                                                | <i>PIK3CA</i> p.E545K                                        | 16                                                 | Not detected                              | Negative             | .                       | .                                                              | .                                              | No                    | 1.8                      |
| LCR 023    | Yes       | High                | 51.3                                                     | No         |                    | <i>TP53</i> p.R273H; <i>KRAS</i> p.G12D; <i>APC</i> p.Q1429X                         | <i>TP53</i> p.R273H                                          | 47                                                 | Not detected                              | Negative             | Negative                | .                                                              | .                                              | No                    | 1.8                      |
| LCR 024    | No        | High                | 50.0                                                     | No         |                    | <i>BRAF</i> p.D594N                                                                  | <i>BRAF</i> p.D594N                                          | 62                                                 | Not detected                              | Negative             | .                       | .                                                              | .                                              | No                    | 1.0                      |
| LCR 025    | No        | Low                 | 49.9                                                     | No         |                    | <i>PIK3CA</i> p.H1047R                                                               | <i>PIK3CA</i> p.H1047R                                       | 10                                                 | Not detected                              | Negative             | .                       | .                                                              | .                                              | No                    | <0.5                     |
| LCR 026    | Yes       | Low                 | 47.5                                                     | No         |                    | <i>KRAS</i> p.G13D; <i>TP53</i> p.R282W; <i>FBXW7</i> p.R 505H                       | <i>KRAS</i> p.G13D                                           | 31                                                 | Not detected                              | Negative             | Negative                | .                                                              | .                                              | No                    | 2.4                      |
| LCR 027    | No        | Low                 | 44.0                                                     | No         |                    | <i>BRAF</i> p.V600E                                                                  | <i>BRAF</i> p.V600E                                          | 21                                                 | Not detected                              | Negative             | .                       | .                                                              | .                                              | No                    | 0.8                      |
| LCR 028    | No        | Low                 | 50.0                                                     | No         |                    | <i>APC</i> p.R1450X                                                                  | <i>APC</i> p.R1450X                                          | 120                                                | Not detected                              | Negative             | .                       | .                                                              | .                                              | No                    | 1.1                      |
| LCR 029    | No        | Low                 | 47.7                                                     | No         |                    | <i>KRAS</i> p.G12V; <i>TP53</i> p.V272Vfs                                            | <i>KRAS</i> p.G12V                                           | 17                                                 | Not detected                              | Negative             | .                       | .                                                              | .                                              | Yes                   | 5.9                      |
| LCR 030    | No        | Low                 | 5.0                                                      | Yes        | Liver              | <i>TP53</i> p.R342X                                                                  | <i>TP53</i> p.R342X                                          | 6.2                                                | 1.631                                     | Positive             | .                       | Positive                                                       | 115                                            | No                    | 2.0                      |
| LCR 031    | Yes       | High                | 49.8                                                     | No         |                    | <i>TP53</i> p.V272fs; <i>APC</i> p.E1353X                                            | <i>TP53</i> p.V272fs                                         | 160                                                | Not detected                              | Negative             | Negative                | .                                                              | .                                              | No                    | 0.5                      |
| LCR 032    | No        | High                | 37.6                                                     | No         |                    | <i>TP53</i> p.S215R; <i>TP53</i> p.Y220C; <i>KRAS</i> p.A146T                        | <i>TP53</i> p.S215R                                          | 140                                                | Not detected                              | Negative             | .                       | .                                                              | .                                              | No                    | 1.3                      |
| LCR 033    | No        | Low                 | 33.6                                                     | No         |                    | <i>KRAS</i> p.G12R                                                                   | <i>KRAS</i> p.G12R                                           | 66                                                 | Not detected                              | Negative             | .                       | .                                                              | .                                              | No                    | 0.5                      |
| LCR 034    | No        | Low                 | 19.4                                                     | No         |                    | <i>BRAF</i> p.V600E                                                                  | <i>BRAF</i> p.V600E                                          | 31                                                 | Not detected                              | Negative             | .                       | .                                                              | .                                              | No                    | 2.5                      |
| LCR 035    | No        | High                | 44.5                                                     | No         |                    | <i>FBXW7</i> p.R479Q; <i>TP53</i> p.G245D                                            | <i>FBXW7</i> p.R479Q                                         | 40                                                 | Not detected                              | Negative             | .                       | .                                                              | .                                              | No                    | 1.3                      |
| LCR 036    | Yes       | Low                 | 34.1                                                     | No         |                    | <i>TP53</i> p.G245D                                                                  | <i>TP53</i> p.G245D                                          | 99                                                 | 0.123                                     | Positive             | Negative                | .                                                              | .                                              | No                    | 0.5                      |
| LCR 037    | No        | Low                 | 37.8                                                     | No         |                    | <i>KRAS</i> p.G12R                                                                   | <i>KRAS</i> p.G12R                                           | 31                                                 | Not detected                              | Negative             | .                       | .                                                              | .                                              | No                    | 1.0                      |
| LCR 038    | No        | Low                 | 27.4                                                     | No         |                    | <i>PIK3CA</i> p.H1047R; <i>TP53</i> p.R248Q; <i>NRAS</i> p.Q61K; <i>BRAF</i> p.V600E | <i>PIK3CA</i> p.H1047R                                       | 29                                                 | Not detected                              | Negative             | .                       | .                                                              | .                                              | No                    | 1.0                      |
| LCR 039    | No        | High                | 8.3                                                      | Yes        | Liver              | <i>TP53</i> p.R282W                                                                  | <i>TP53</i> p.R282W                                          | 23                                                 | Not detected                              | Negative             | .                       | Not available                                                  | Not available                                  | No                    | 1.7                      |
| LCR 040    | Yes       | High                | 42.8                                                     | No         |                    | <i>BRAF</i> p.V600E; <i>TP53</i> p.R282W                                             | <i>BRAF</i> p.V600E                                          | 42                                                 | Not detected                              | Negative             | Negative                | .                                                              | .                                              | No                    | 0.7                      |
| LCR 041    | Yes       | High                | 38.3                                                     | No         |                    | <i>TP53</i> p.Y126H                                                                  | <i>TP53</i> p.Y126H                                          | 11                                                 | Not detected                              | Negative             | Negative                | .                                                              | .                                              | No                    | 0.9                      |
| LCR 042    | Yes       | High                | 46.4                                                     | No         |                    | <i>TP53</i> p.R273H                                                                  | <i>TP53</i> p.R273H                                          | 85                                                 | Not detected                              | Negative             | Negative                | .                                                              | .                                              | No                    | 0.8                      |
| LCR 043    | No        | Low                 | 46.4                                                     | No         |                    | <i>FBXW7</i> p.R505C                                                                 | <i>FBXW7</i> p.R505C                                         | 26                                                 | Not detected                              | Negative             | .                       | .                                                              | .                                              | No                    | 0.9                      |

|         |     |      |      |     |                          |                                                               |                       |     |              |          |               |          |     |     |     |
|---------|-----|------|------|-----|--------------------------|---------------------------------------------------------------|-----------------------|-----|--------------|----------|---------------|----------|-----|-----|-----|
| LCR 044 | No  | Low  | 44.8 | No  |                          | <i>TP53</i> p.E294X                                           | <i>TP53</i> p.E294X   | 16  | Not detected | Negative | .             | .        | .   | No  | 0.9 |
| LCR 045 | Yes | Low  | 39.6 | No  |                          | <i>TP53</i> p.R273H; <i>KRAS</i> p.G13D                       | <i>TP53</i> p.R273H   | 40  | Not detected | Negative | Negative      | .        | .   | No  | 0.5 |
| LCR 046 | Yes | High | 46.1 | No  |                          | <i>TP53</i> p.R273C                                           | <i>TP53</i> p.R273C   | 61  | Not detected | Negative | Negative      | .        | .   | No  | 0.5 |
| LCR 047 | Yes | High | 31.5 | No  |                          | <i>KRAS</i> p.G12C; <i>TP53</i> p.R282W                       | <i>KRAS</i> p.G12C    | 22  | Not detected | Negative | Not available | .        | .   | No  | 1.4 |
| LCR 048 | Yes | High | 43.1 | No  |                          | <i>APC</i> p.S1298fs; <i>APC</i> p.R805X; <i>TP53</i> p.R342X | <i>APC</i> p.S1298fs  | 6.2 | Not detected | Negative | Negative      | .        | .   | No  | 1.4 |
| LCR 049 | No  | Low  | 43.7 | No  |                          | <i>APC</i> p.R1450X; <i>KRAS</i> p.G12V                       | <i>APC</i> p.R1450X   | 31  | Not detected | Negative | .             | .        | .   | No  | 1.7 |
| LCR 050 | No  | Low  | 38.9 | No  |                          | <i>BRAF</i> p.V600E                                           | <i>BRAF</i> p.V600E   | 31  | Not detected | Negative | .             | .        | .   | Yes | 5.5 |
| LCR 051 | No  | High | 7.7  | Yes | Lung                     | <i>TP53</i> p.R273C                                           | <i>TP53</i> p.R273C   | 75  | Not detected | Negative | .             | Positive | 22  | No  | 1.6 |
| LCR 052 | No  | Low  | 35.6 | No  |                          | <i>PIK3CA</i> p.Q546K; <i>KRAS</i> p.G12C                     | <i>PIK3CA</i> p.Q546K | 16  | Not detected | Negative | .             | .        | .   | No  | 0.5 |
| LCR 053 | No  | High | 27.0 | No  |                          | <i>APC</i> p.A1485fs; <i>TP53</i> g.7579310T>A.(splice site)  | <i>APC</i> p.A1485fs  | 6.8 | Not detected | Negative | .             | .        | .   | No  | 2.3 |
| LCR 054 | No  | Low  | 36.3 | No  |                          | <i>TP53</i> p.R248Q                                           | <i>TP53</i> p.R248Q   | 16  | Not detected | Negative | .             | .        | .   | No  | 4.1 |
| LCR 055 | No  | High | 36.3 | No  |                          | <i>KRAS</i> p.G12A                                            | <i>KRAS</i> p.G12A    | 31  | Not detected | Negative | .             | .        | .   | No  | 1.7 |
| LCR 056 | No  | Low  | 38.4 | Yes | Liver                    | <i>TP53</i> p.R213X                                           | <i>TP53</i> p.R213X   | 36  | Not detected | Negative | .             | Positive | 616 | No  | 0.5 |
| LCR 057 | No  | High | 37.3 | No  |                          | <i>KRAS</i> p.G12V; <i>FBXW7</i> p.R465H                      | <i>KRAS</i> p.G12V    | 31  | Not detected | Negative | .             | .        | .   | No  | 2.0 |
| LCR 058 | No  | High | 40.0 | No  |                          | <i>TP53</i> p.R248Q; <i>FBXW7</i> p.R505C                     | <i>TP53</i> p.R248Q   | 18  | Not detected | Negative | .             | .        | .   | No  | 0.5 |
| LCR 059 | Yes | Low  | 35.7 | No  |                          | <i>TP53</i> p.C135F; <i>KRAS</i> p.G12D                       | <i>TP53</i> p.C135F   | 41  | Not detected | Negative | Negative      | .        | .   | No  | 0.7 |
| LCR 060 | Yes | Low  | 42.3 | No  |                          | <i>APC</i> p.S1426fs; <i>TP53</i> p.G244D                     | <i>APC</i> p.S1426fs  | 220 | Not detected | Negative | Negative      | .        | .   | No  | 2.0 |
| LCR 061 | No  | Low  | 41.3 | No  |                          | <i>APC</i> p.E1322X; <i>KRAS</i> p.G12D                       | <i>APC</i> p.E1322X   | 31  | Not detected | Negative | .             | .        | .   | No  | 1.5 |
| LCR 062 | No  | Low  | 7.8  | Yes | Peritoneal, omentum      | <i>BRAF</i> p.V600E; <i>PIK3CA</i> p.E545K                    | <i>BRAF</i> p.V600E   | 20  | Not detected | Negative | .             | Positive | 81  | No  | 2.4 |
| LCR 063 | No  | Low  | 41.3 | No  |                          | <i>TP53</i> p.R175H; <i>KRAS</i> p.G12D                       | <i>TP53</i> p.R175H   | 31  | Not detected | Negative | .             | .        | .   | No  | 1.3 |
| LCR 064 | Yes | NA   | 36.0 | No  |                          | <i>APC</i> p.Q1303fs; <i>APC</i> p.S836fs                     | <i>APC</i> p.Q1303fs  | 65  | Not detected | Negative | Negative      | .        | .   | No  | 0.5 |
| LCR 066 | No  | Low  | 40.3 | No  |                          | <i>BRAF</i> p.V600E                                           | <i>BRAF</i> p.V600E   | 99  | Not detected | Negative | .             | .        | .   | No  | 0.9 |
| LCR 067 | No  | Low  | 34.7 | No  |                          | <i>KRAS</i> p.G12D                                            | <i>KRAS</i> p.G12D    | 25  | Not detected | Negative | .             | .        | .   | No  | 1.1 |
| LCR 133 | No  | Low  | 36.1 | No  |                          | <i>APC</i> p.E1573X; <i>TP53</i> p.R342X                      | <i>APC</i> p.E1573X   | 27  | Not detected | Negative | .             | .        | .   | No  | 0.9 |
| LCR 134 | No  | Low  | 35.1 | No  |                          | <i>NRAS</i> p.Q61K                                            | <i>NRAS</i> p.Q61K    | 15  | Not detected | Negative | .             | .        | .   | No  | 1.2 |
| LCR 135 | No  | Low  | 32.3 | No  |                          | <i>NRAS</i> p.Q61K; <i>APC</i> p.R876X                        | <i>NRAS</i> p.Q61K    | 38  | Not detected | Negative | .             | .        | .   | No  | 3.9 |
| LCR 136 | No  | Low  | 37.4 | No  |                          | <i>TP53</i> p.N29fs; <i>SMAD4</i> p.R361C                     | <i>TP53</i> p.N29fs   | 20  | Not detected | Negative | .             | .        | .   | No  | 0.9 |
| LCR 137 | No  | High | 7.8  | Yes | Loco-regional recurrence | <i>TP53</i> p.M237I; <i>KRAS</i> p.G12D                       | <i>TP53</i> p.M237I   | 37  | Not detected | Negative | .             | Positive | 11  | Yes | 6.2 |



|         |     |      |      |     |                        |                                             |                                |     |              |          |          |               |                            |     |      |
|---------|-----|------|------|-----|------------------------|---------------------------------------------|--------------------------------|-----|--------------|----------|----------|---------------|----------------------------|-----|------|
| LCR 138 | No  | Low  | 17.4 | Yes | Liver                  | TP53 p.L264(in frame deletion); APC p.R876X | TP53 p.L264(in frame deletion) | 20  | Not detected | Negative | .        | Positive      | 113                        | No  | 2.2  |
| LCR 139 | Yes | High | 36.4 | No  |                        | TP53 p.R248Q                                | TP53 p.R248Q                   | 13  | Not detected | Negative | Negative | .             | .                          | No  | 1.4  |
| LCR 140 | No  | Low  | 38.2 | No  |                        | TP53 p.R282W; APC p.E1408X                  | TP53 p.R282W                   | 12  | Not detected | Negative | .        | .             | .                          | No  | 0.6  |
| LCR 141 | No  | Low  | 33.5 | No  |                        | TP53 p.R282W                                | TP53 p.R282W                   | 15  | Not detected | Negative | .        | .             | .                          | No  | 3.3  |
| LCR 142 | No  | Low  | 32.3 | No  |                        | BRAF p.V600E                                | BRAF p.V600E                   | 58  | Not detected | Negative | .        | .             | .                          | No  | 2.9  |
| LCR 143 | No  | Low  | 29.4 | No  |                        | TP53 p.R213X ; APC p.E1309fs                | TP53 p.R213X                   | 24  | Not detected | Negative | .        | .             | .                          | No  | 1.1  |
| LCR 144 | No  | Low  | 34.7 | No  |                        | TP53 p.G245V                                | TP53 p.G245V                   | 130 | Not detected | Negative | .        | .             | .                          | No  | 1.3  |
| LCR 145 | No  | Low  | 32.5 | No  |                        | CTNNB1 p.D32N                               | CTNNB1 p.D32N                  | 19  | Not detected | Negative | .        | .             | .                          | No  | 1.5  |
| LCR 146 | No  | Low  | 32.4 | No  |                        | BRAF p.V600E; TP53 p.I255T                  | BRAF p.V600E                   | 110 | Not detected | Negative | .        | .             | .                          | No  | 1.4  |
| LCR 147 | No  | Low  | 31.3 | No  |                        | BRAF p.V600E                                | BRAF p.V600E                   | 38  | Not detected | Negative | .        | .             | .                          | No  | 0.2  |
| LCR 148 | Yes | Low  | 9.3  | Yes | Liver                  | APC p.L878fs; KRAS p.G12S                   | APC p.L878fs                   | 12  | 0.11         | Positive | Negative | Negative      | Not detected at recurrence | Yes | 9.5  |
| LCR 149 | No  | High | 7.7  | No  |                        | TP53 p.R213L                                | TP53 p.R213L                   | 15  | Not detected | Negative | .        | .             | .                          | No  | 0.7  |
| LCR 150 | No  | Low  | 8.3  | No  |                        | KRAS p.G12D; TP53 p.R248W                   | KRAS p.G12D                    | 17  | Not detected | Negative | .        | .             | .                          | No  | 2.6  |
| LCR 151 | No  | Low  | 11.2 | Yes | Liver                  | TP53 p.R273C; APC p.E1306X                  | TP53 p.R273C                   | 27  | Not detected | Negative | .        | Not available | Not available              | No  | 1.9  |
| LCR 152 | No  | Low  | 35.2 | No  |                        | KRAS p.G12D; PIK3CA p.E545K                 | KRAS p.G12D                    | 25  | Not detected | Negative | .        | .             | .                          | No  | 0.5  |
| LCR 153 | No  | High | 23.8 | Yes | Anastomotic recurrence | TP53 p.R248Q; APC p.R1114X                  | TP53 p.R248Q                   | 30  | 0.01         | Positive | .        | Positive      | 641                        | No  | 0.9  |
| LCR 154 | No  | Low  | 32.4 | No  |                        | APC p.E1374X; TP53 p.L130V                  | APC p.E1374X                   | 13  | Not detected | Negative | .        | .             | .                          | No  | 1.9  |
| LCR 155 | Yes | High | 32.8 | No  |                        | TP53 p.R248Q; APC p.Q1378X                  | TP53 p.R248Q                   | 70  | 0.006        | Positive | Negative | .             | .                          | No  | 1.0  |
| LCR 156 | No  | Low  | 1.6  | No  |                        | BRAF p.V600E                                | BRAF p.V600E                   | 55  | Not detected | Negative | .        | .             | .                          | No  | 1.2  |
| LCR 157 | No  | Low  | 22.0 | No  |                        | KRAS p.G13D; PIK3CA p.E545K                 | KRAS p.G13D                    | 22  | Not detected | Negative | .        | .             | .                          | No  | 0.5  |
| LCR 158 | No  | High | 30.4 | No  |                        | KRAS p.G12V                                 | KRAS p.G12V                    | 6.8 | Not detected | Negative | .        | .             | .                          | No  | 3.2  |
| LCR 159 | No  | Low  | 34.5 | No  |                        | TP53 p.K164N; TP53 p.Q165K; APC p.E1397X    | TP53 p.K164N                   | 11  | Not detected | Negative | .        | .             | .                          | No  | 1.7  |
| LCR 160 | Yes | High | 27.6 | No  |                        | FBXW7 p.R465C; SMAD4 p.R361H                | FBXW7 p.R465C                  | 8.4 | Not detected | Negative | Negative | .             | .                          | No  | 0.8  |
| LCR 187 | No  | Low  | 29.5 | No  |                        | KRAS p.G12D; PPP2RIA p.R183W                | KRAS p.G12D                    | 21  | Not detected | Negative | .        | .             | .                          | No  | 0.5  |
| LCR 188 | Yes | High | 31.4 | No  |                        | APC p.C1578fs; KRAS p.G12D                  | APC p.C1578fs                  | 17  | Not detected | Negative | Negative | .             | .                          | No  | 1.0  |
| LCR 189 | No  | Low  | 31.2 | No  |                        | APC p.R1450X; KRAS p.G13D                   | APC p.R1450X                   | 38  | Not detected | Negative | .        | .             | .                          | No  | 4.8  |
| LCR 190 | No  | Low  | 35.2 | No  |                        | BRAF p.V600E                                | BRAF p.V600E                   | 53  | Not detected | Negative | .        | .             | .                          | No  | 0.6  |
| LCR 191 | No  | Low  | 15.6 | No  |                        | APC p.S1415fs; TP53 p.C275F                 | APC p.S1415fs                  | 23  | Not detected | Negative | .        | .             | .                          | No  | <0.5 |
| LCR 192 | No  | Low  | 24.4 | No  |                        | APC p.T1537fs; APC p.Y935fs; KRAS p.A146V   | APC p.T1537fs                  | 33  | Not detected | Negative | .        | .             | .                          | No  | 3.1  |

|         |     |      |      |     |                           |                                                                                    |                                        |     |              |          |          |          |                            |               |               |
|---------|-----|------|------|-----|---------------------------|------------------------------------------------------------------------------------|----------------------------------------|-----|--------------|----------|----------|----------|----------------------------|---------------|---------------|
| LCR 193 | No  | Low  | 26.7 | No  |                           | <i>BRAF</i> p.V600E; <i>PIK3CA</i> p.Q546R                                         | <i>BRAF</i> p.V600E                    | 57  | Not detected | Negative | .        | .        | .                          | No            | 1.8           |
| LCR 194 | No  | Low  | 31.7 | No  |                           | <i>CTNNB1</i> p.T41A; <i>TP53</i> g.7576851T>C (splice site); <i>AKT1</i> p.E17K   | <i>CTNNB1</i> p.T41A                   | 110 | Not detected | Negative | .        | .        | .                          | Yes           | 8.7           |
| LCR 195 | No  | High | 27.2 | No  |                           | <i>APC</i> p.D1486fs; <i>TP53</i> p.C238Y; <i>KRAS</i> p.G12D                      | <i>APC</i> p.D1486fs                   | 25  | Not detected | Negative | .        | .        | .                          | No            | 1.2           |
| LCR 196 | No  | High | 7.6  | Yes | Lung                      | <i>TP53</i> p.R248Q; <i>NRAS</i> p.G12V                                            | <i>TP53</i> p.R248Q                    | 43  | 0.017        | Positive | .        | Positive | 175                        | No            | 2.1           |
| LCR 197 | No  | Low  | 24.3 | No  |                           | <i>TP53</i> p.P301fs; <i>BRAF</i> p.V600E                                          | <i>TP53</i> p.P301fs                   | 37  | Not detected | Negative | .        | .        | .                          | Not available | Not available |
| LCR 198 | Yes | NA   | 31.9 | Yes | Submucosal rectal deposit | <i>TP53</i> p.L252fs; <i>TP53</i> p.E349X; <i>APC</i> p.Q1429X                     | <i>TP53</i> p.L252fs                   | 24  | Not detected | Negative | Negative | Positive | 266                        | No            | 0.5           |
| LCR 200 | No  | Low  | 37.2 | No  |                           | <i>APC</i> p.S1436fs; <i>TP53</i> p.R306X                                          | <i>APC</i> p.S1436fs                   | 44  | Not detected | Negative | .        | .        | .                          | No            | 1.0           |
| LCR 201 | No  | Low  | 37.7 | No  |                           | <i>BRAF</i> p.V600E                                                                | <i>BRAF</i> p.V600E                    | 59  | Not detected | Negative | .        | .        | .                          | No            | 2.0           |
| LCR 202 | Yes | High | 32.3 | No  |                           | <i>TP53</i> p.R282W; <i>BRAF</i> p.V600E                                           | <i>TP53</i> p.R282W                    | 13  | Not detected | Negative | Negative | .        | .                          | Not available | Not available |
| LCR 203 | No  | Low  | 28.0 | No  |                           | <i>TP53</i> p.C229X; <i>APC</i> p.G1094X                                           | <i>TP53</i> p.C229X                    | 65  | Not detected | Negative | .        | .        | .                          | No            | 0.7           |
| LCR 204 | No  | High | 32.1 | No  |                           | <i>APC</i> p.P1159fs; <i>APC</i> p.E941X                                           | <i>APC</i> p.P1159fs                   | 32  | Not detected | Negative | .        | .        | .                          | No            | 0.9           |
| LCR 205 | No  | Low  | 32.6 | No  |                           | <i>APC</i> p.V1414fs; <i>TP53</i> p.T125R                                          | <i>APC</i> p.V1414fs                   | 33  | Not detected | Negative | .        | .        | .                          | No            | 2.5           |
| LCR 206 | No  | Low  | 33.4 | No  |                           | <i>FBXW7</i> p.E471fs; <i>BRAF</i> p.V600E; <i>PIK3CA</i> p.E545K                  | <i>FBXW7</i> p.E471fs                  | 54  | Not detected | Negative | .        | .        | .                          | No            | 0.5           |
| LCR 207 | Yes | High | 23.5 | Yes | Lung                      | <i>TP53</i> p.G245S; <i>APC</i> p.R1450X; <i>KRAS</i> p.G12C                       | <i>TP53</i> p.G245S                    | 35  | Not detected | Negative | Negative | Negative | Not detected at recurrence | No            | 3.1           |
| LCR 208 | No  | High | 41.6 | No  |                           | <i>APC</i> p.K1308fs; <i>TP53</i> p.R248W                                          | <i>APC</i> p.K1308fs                   | 40  | Not detected | Negative | .        | .        | .                          | No            | 2.8           |
| LCR 209 | No  | High | 29.1 | No  |                           | <i>APC</i> p.L1488X                                                                | <i>APC</i> p.L1488X                    | 45  | Not detected | Negative | .        | .        | .                          | No            | 1.8           |
| LCR 210 | Yes | Low  | 23.0 | No  |                           | <i>APC</i> p.A1351fs                                                               | <i>APC</i> p.A1351fs                   | 25  | Not detected | Negative | Negative | .        | .                          | Yes           | 6.4           |
| LCR 211 | No  | Low  | 30.0 | No  |                           | <i>APC</i> p.S1545X; <i>APC</i> p.R1114X; <i>KRAS</i> p.A146T; <i>POLE</i> p.P286R | <i>APC</i> p.S1545X                    | 22  | Not detected | Negative | .        | .        | .                          | No            | 0.9           |
| LCR 212 | Yes | High | 31.6 | No  |                           | <i>SMAD4</i> p.S178X; <i>KRAS</i> p.G12D                                           | <i>SMAD4</i> p.S178X                   | 29  | Not detected | Negative | Negative | .        | .                          | No            | 2.0           |
| LCR 213 | No  | High | 30.6 | No  |                           | <i>TP53</i> p.E287 (In frame deletion)                                             | <i>TP53</i> p.E287 (In frame deletion) | 19  | Not detected | Negative | .        | .        | .                          | No            | 0.5           |
| LCR 214 | Yes | Low  | 33.4 | No  |                           | <i>APC</i> p.T1487fs; <i>TP53</i> p.R342X; <i>APC</i> p.Y935fs                     | <i>APC</i> p.T1487fs                   | 34  | Not detected | Negative | Negative | .        | .                          | No            | 0.5           |
| LCR 215 | Yes | High | 32.3 | No  |                           | <i>APC</i> p.N1300fs; <i>TP53</i> p.K320X                                          | <i>APC</i> p.N1300fs                   | 23  | Not detected | Negative | Negative | .        | .                          | No            | 0.5           |
| LCR 216 | No  | High | 28.5 | No  |                           | <i>TP53</i> p.H193Y; <i>APC</i> p.Q1291X                                           | <i>TP53</i> p.H193Y                    | 22  | Not detected | Negative | .        | .        | .                          | Yes           | 6.8           |
| LCR 217 | No  | Low  | 33.2 | No  |                           | <i>APC</i> p.T1556fs; <i>APC</i> p.R805X                                           | <i>APC</i> p.T1556fs                   | 36  | Not detected | Negative | .        | .        | .                          | No            | 2.6           |
| LCR 218 | Yes | Low  | 26.1 | No  |                           | <i>APC</i> p.R1331X; <i>TP53</i> p.R248Q; <i>KRAS</i> p.G13D                       | <i>APC</i> p.R1331X                    | 19  | Not detected | Negative | Negative | .        | .                          | No            | 4.6           |
| LCR 219 | Yes | NA   | 12.0 | No  |                           | <i>BRAF</i> p.V600E                                                                | <i>BRAF</i> p.V600E                    | 32  | Not detected | Negative | Negative | .        | .                          | No            | 2.0           |
| LCR 220 | Yes | High | 29.0 | No  |                           | <i>TP53</i> p.R248W                                                                | <i>TP53</i> p.R248W                    | 31  | Not detected | Negative | Negative | .        | .                          | No            | 1.3           |

|         |     |      |      |     |                              |                                                          |                |     |              |          |               |               |               |    |     |
|---------|-----|------|------|-----|------------------------------|----------------------------------------------------------|----------------|-----|--------------|----------|---------------|---------------|---------------|----|-----|
| LCR 221 | No  | Low  | 25.0 | No  |                              | APC p.T1301fs; TP53 p.R213Q; KRAS p.G12V; PIK3CA p.E545K | APC p.T1301fs  | 26  | Not detected | Negative | .             | .             | .             | No | 1.0 |
| LCR 222 | No  | Low  | 31.9 | No  |                              | KRAS p.G12C; TP53 p.R175H                                | KRAS p.G12C    | 19  | Not detected | Negative | .             | .             | .             | No | 0.5 |
| LCR 223 | No  | Low  | 30.7 | No  |                              | RNF43 p.R657fs                                           | RNF43 p.R657fs | 43  | Not detected | Negative | .             | .             | .             | No | 0.9 |
| LCR 224 | Yes | High | 15.1 | Yes | Anastomotic recurrence       | TP53 p.W91X; KRAS p.G13D                                 | TP53 p.W91X    | 42  | Not detected | Negative | Negative      | Positive      | 0             | No | 0.5 |
| LCR 225 | No  | High | 26.7 | No  |                              | APC p.S1400fs; TP53 p.R175H                              | APC p.S1400fs  | 58  | Not detected | Negative | .             | .             | .             | No | 1.4 |
| LCR 226 | No  | Low  | 31.1 | No  |                              | TP53 p.Q52X; KRAS p.G12D                                 | TP53 p.Q52X    | 37  | Not detected | Negative | .             | .             | .             | No | 0.5 |
| LCR 227 | Yes | High | 27.3 | No  |                              | APC p.E1379X; TP53 p.R282W; KRAS p.G12D                  | APC p.E1379X   | 21  | Not detected | Negative | Negative      | .             | .             | No | 0.7 |
| LCR 228 | No  | Low  | 29.7 | No  |                              | APC p.E868X; KRAS p.G12V                                 | APC p.E868X    | 120 | Not detected | Negative | .             | .             | .             | No | 0.8 |
| LCR 229 | Yes | High | 31.8 | No  |                              | SMAD4 p.E526X; APC p.S1201X; APC p.R1450X; POLE p.P286R  | SMAD4 p.E526X  | 25  | Not detected | Negative | Not available | .             | .             | No | 1.4 |
| LCR 230 | No  | Low  | 27.3 | No  |                              | APC p.Q1338X; TP53 p.R248W                               | APC p.Q1338X   | 42  | Not detected | Negative | .             | .             | .             | No | 1.3 |
| LCR 231 | Yes | High | 31.5 | No  |                              | TP53 p.H179Y; KRAS p.G12D                                | TP53 p.H179Y   | 52  | Not detected | Negative | Negative      | .             | .             | No | 0.9 |
| LCR 232 | No  | Low  | 28.3 | No  |                              | PIK3CA p.Q546R; KRAS p.G12D; GNAS p.R201H; APC p.I1307fs | PIK3CA p.Q546R | 38  | Not detected | Negative | .             | .             | .             | No | 0.8 |
| LCR 233 | No  | Low  | 31.1 | No  |                              | APC p.T1493fs; KRAS p.G13D; APC p.R876X; PIK3CA p.E545K  | APC p.T1493fs  | 51  | Not detected | Negative | .             | .             | .             | No | 0.5 |
| LCR 234 | No  | High | 24.9 | No  |                              | TP53 p.A159P; KRAS p.G12D; SMAD4 p.R361H; APC p.E1322X   | TP53 p.A159P   | 220 | Not detected | Negative | .             | .             | .             | No | 1.5 |
| LCR 235 | No  | Low  | 7.7  | Yes | Local and peritoneal         | KRAS p.G12C; TP53 p.R175H; SMAD4 p.P356L                 | KRAS p.G12C    | 39  | Not detected | Negative | .             | Positive      | 92            | No | 3.5 |
| LCR 236 | No  | High | 6.5  | Yes | Liver                        | APC p.Q1406fs; TP53 p.P250L; PIK3CA p.E545K              | APC p.Q1406fs  | 32  | 0.059        | Positive | .             | Positive      | 167           | No | 1.3 |
| LCR 237 | No  | High | 6.1  | Yes | Liver, lung, and lymph nodes | APC p.E1379X; TP53 p.R306X                               | APC p.E1379X   | 270 | 0.235        | Positive | .             | Positive      | 168           | No | 2.8 |
| LCR 316 | Yes | High | 24.8 | No  |                              | TP53 p.E258K; APC p.Q1360X                               | TP53 p.E258K   | 11  | Not detected | Negative | Negative      | .             | .             | No | 1.6 |
| LCR 317 | No  | Low  | 24.8 | No  |                              | APC p.P1373fs; TP53 p.V216M                              | APC p.P1373fs  | 8.3 | Not detected | Negative | .             | .             | .             | No | 1.5 |
| LCR 318 | No  | Low  | 24.0 | No  |                              | BRAF p.V600E; TP53 p.C238Y                               | BRAF p.V600E   | 10  | Not detected | Negative | .             | .             | .             | No | 0.6 |
| LCR 319 | No  | Low  | 20.5 | No  |                              | APC p.T1556fs; KRAS p.G12D                               | APC p.T1556fs  | 33  | Not detected | Negative | .             | .             | .             | No | 1.3 |
| LCR 320 | No  | Low  | 18.5 | No  |                              | TP53 p.R175fs; KRAS p.G12C; APC p.R858X; APC p.Q1276X    | TP53 p.R175fs  | 20  | Not detected | Negative | .             | .             | .             | No | 3.3 |
| LCR 321 | No  | High | 18.8 | Yes | Brain                        | TP53 p.T312fs; KRAS p.G12C; APC p.1441fs                 | TP53 p.T312fs  | 33  | Not detected | Negative | .             | Not available | Not available | No | 0.9 |
| LCR 322 | No  | Low  | 24.1 | No  |                              | TP53 p.R248Q; KRAS p.A146T; APC p.R858X                  | TP53 p.R248Q   | 49  | Not detected | Negative | .             | .             | .             | No | 1.9 |
| LCR 323 | No  | High | 20.5 | No  |                              | TP53 p.R282W                                             | TP53 p.R282W   | 30  | Not detected | Negative | .             | .             | .             | No | 1.2 |
| LCR 324 | No  | Low  | 16.1 | No  |                              | APC p.I1307fs; TP53 p.R116W                              | APC p.I1307fs  | 29  | Not detected | Negative | .             | .             | .             | No | 4.0 |

|         |     |      |      |     |                           |                                                                                                                                 |                       |     |              |          |          |               |                            |               |               |
|---------|-----|------|------|-----|---------------------------|---------------------------------------------------------------------------------------------------------------------------------|-----------------------|-----|--------------|----------|----------|---------------|----------------------------|---------------|---------------|
| LCR 325 | Yes | High | 13.1 | Yes | Liver                     | <i>KRAS</i> p.G13D                                                                                                              | <i>KRAS</i> p.G13D    | 30  | 0.066        | Positive | Positive | Positive      | 343                        | No            | 1.6           |
| LCR 326 | No  | Low  | 16.0 | No  |                           | <i>TP53</i> p.Y126C                                                                                                             | <i>TP53</i> p.Y126C   | 38  | Not detected | Negative | .        | .             | .                          | No            | 1.9           |
| LCR 327 | No  | Low  | 17.9 | No  |                           | <i>APC</i> p.S1415fs; <i>TP53</i> p.R141C                                                                                       | <i>APC</i> p.S1415fs  | 8.6 | Not detected | Negative | .        | .             | .                          | No            | 1.2           |
| LCR 328 | No  | High | 8.2  | No  |                           | <i>KRAS</i> p.G12V                                                                                                              | <i>KRAS</i> p.G12V    | 11  | Not detected | Negative | .        | .             | .                          | No            | 0.3           |
| LCR 329 | No  | Low  | 5.5  | No  |                           | <i>BRAF</i> p.V600E                                                                                                             | <i>BRAF</i> p.V600E   | 28  | Not detected | Negative | .        | .             | .                          | Not available | Not available |
| LCR 330 | Yes | High | 22.0 | No  |                           | <i>APC</i> p.E1309fs; <i>TP53</i> p.R116W; <i>KRAS</i> p.G12D                                                                   | <i>APC</i> p.E1309fs  | 34  | Not detected | Negative | Negative | .             | .                          | No            | 1.2           |
| LCR 331 | No  | High | 20.0 | No  |                           | <i>APC</i> p.E1552X; <i>BRAF</i> p.V600E; <i>PIK3CA</i> p.E545K                                                                 | <i>APC</i> p.E1552X   | 17  | Not detected | Negative | .        | .             | .                          | No            | 1.9           |
| LCR 332 | No  | Low  | 11.7 | Yes | Liver                     | <i>TP53</i> p.R248Q; <i>APC</i> p.E1322X; <i>FBXW7</i> p.R465C                                                                  | <i>TP53</i> p.R248Q   | 21  | 0.678        | Positive | .        | Positive      | 279                        | No            | 1.0           |
| LCR 333 | No  | Low  | 23.9 | No  |                           | <i>APC</i> p.Y1183fs; <i>KRAS</i> p.G12V; <i>PIK3CA</i> p.E545K                                                                 | <i>APC</i> p.Y1183fs  | 22  | Not detected | Negative | .        | .             | .                          | No            | 1.0           |
| LCR 334 | No  | High | 16.2 | No  |                           | <i>APC</i> p.Q1378X; <i>TP53</i> p.R213X                                                                                        | <i>APC</i> p.Q1378X   | 49  | Not detected | Negative | .        | .             | .                          | No            | <1            |
| LCR 335 | Yes | High | 20.3 | No  |                           | <i>APC</i> p.E1552fs; <i>TP53</i> p.R175H                                                                                       | <i>APC</i> p.E1552fs  | 18  | Not detected | Negative | Negative | .             | .                          | No            | 1.0           |
| LCR 337 | No  | Low  | 16.3 | No  |                           | <i>SMAD4</i> p.P298fs; <i>APC</i> p.E941X; <i>APC</i> p.R1450X; <i>KRAS</i> p.G12D; <i>FBXW7</i> p.R479Q; <i>PIK3CA</i> p.E542K | <i>SMAD4</i> p.P298fs | 22  | Not detected | Negative | .        | .             | .                          | No            | 1.4           |
| LCR 339 | No  | Low  | 28.4 | No  |                           | <i>BRAF</i> p.V600E; <i>PIK3CA</i> p.H1047Y                                                                                     | <i>BRAF</i> p.V600E   | 21  | Not detected | Negative | .        | .             | .                          | No            | 0.5           |
| LCR 340 | No  | Low  | 28.0 | No  |                           | <i>APC</i> p.E1322X; <i>TP53</i> p.R81X                                                                                         | <i>APC</i> p.E1322X   | 22  | Not detected | Negative | .        | .             | .                          | No            | 1.6           |
| LCR 341 | No  | Low  | 21.6 | No  |                           | <i>APC</i> p.Q1406X; <i>TP53</i> p.R43H; <i>KRAS</i> p.G12D; <i>PIK3CA</i> p.E545K                                              | <i>APC</i> p.Q1406X   | 20  | Not detected | Negative | .        | .             | .                          | No            | 1.2           |
| LCR 342 | Yes | High | 23.2 | No  |                           | <i>APC</i> p.K792fs; <i>TP53</i> p.C3F                                                                                          | <i>APC</i> p.K792fs   | 13  | Not detected | Negative | Negative | .             | .                          | No            | 0.5           |
| LCR 343 | No  | High | 25.9 | No  |                           | <i>APC</i> p.E1353X; <i>TP53</i> p.R43H; <i>KRAS</i> p.G13D                                                                     | <i>APC</i> p.E1353X   | 30  | Not detected | Negative | .        | .             | .                          | No            | 0.5           |
| LCR 344 | No  | Low  | 22.7 | Yes | Liver and lymph nodes     | <i>TP53</i> p.L50fs; <i>APC</i> p.S1382X                                                                                        | <i>TP53</i> p.L50fs   | 29  | Not detected | Negative | .        | Not available | Not available              | No            | 0.5           |
| LCR 345 | No  | Low  | 18.5 | No  |                           | <i>TP53</i> p.D259Y; <i>BRAF</i> p.V600E                                                                                        | <i>TP53</i> p.D259Y   | 38  | Not detected | Negative | .        | .             | .                          | Not available | Not available |
| LCR 346 | No  | High | 5.7  | Yes | Regional nodal recurrence | <i>APC</i> p.A1485fs; <i>KRAS</i> p.G12S; <i>PIK3CA</i> p.E545K                                                                 | <i>APC</i> p.A1485fs  | 28  | Not detected | Negative | .        | Positive      | 35                         | No            | 2.4           |
| LCR 347 | No  | High | 21.8 | No  |                           | <i>APC</i> p.R1432X; <i>KRAS</i> p.G13D                                                                                         | <i>APC</i> p.R1432X   | 20  | Not detected | Negative | .        | .             | .                          | Not available | Not available |
| LCR 348 | No  | Low  | 18.2 | No  |                           | <i>APC</i> p.E1309fs; <i>PIK3CA</i> p.H1047R                                                                                    | <i>APC</i> p.E1309fs  | 9.2 | Not detected | Negative | .        | .             | .                          | No            | 2.0           |
| LCR 349 | No  | Low  | 29.5 | No  |                           | <i>TP53</i> p.G262V; <i>KRAS</i> p.G13D; <i>APC</i> p.E1291X                                                                    | <i>TP53</i> p.G262V   | 48  | Not detected | Negative | .        | .             | .                          | No            | 0.5           |
| LCR 350 | No  | Low  | 8.1  | Yes | Liver and lung            | <i>CTNNB1</i> p.S45F; <i>TP53</i> p.R116Q; <i>KRAS</i> p.G12D                                                                   | <i>CTNNB1</i> p.S45F  | 32  | Not detected | Negative | .        | Not available | Not available              | No            | 3.4           |
| LCR 351 | No  | Low  | 21.8 | No  |                           | <i>APC</i> p.E1464fs; <i>KRAS</i> p.G13D                                                                                        | <i>APC</i> p.E1464fs  | 26  | Not detected | Negative | .        | .             | .                          | No            | 0.5           |
| LCR 352 | No  | Low  | 24.9 | No  |                           | <i>APC</i> p.R876X; <i>APC</i> p.R1450X; <i>KRAS</i> p.G12D                                                                     | <i>APC</i> p.R876X    | 6.7 | Not detected | Negative | .        | .             | .                          | Not available | Not available |
| LCR 353 | No  | High | 6.7  | Yes | Anastomotic recurrence    | <i>APC</i> p.S1328X; <i>KRAS</i> p.G12D                                                                                         | <i>APC</i> p.S1328X   | 260 | Not detected | Negative | .        | Negative      | Not detected at recurrence | No            | 0.5           |

|         |     |      |      |     |             |                                                                       |                |     |              |          |               |               |               |    |      |
|---------|-----|------|------|-----|-------------|-----------------------------------------------------------------------|----------------|-----|--------------|----------|---------------|---------------|---------------|----|------|
| LCR 354 | No  | High | 26.1 | No  |             | APC p.R876X; KRAS p.G12V; GNAS p.R201H; PIK3CA p.Q546R                | APC p.R876X    | 41  | Not detected | Negative | .             | .             | .             | No | 0.5  |
| LCR 355 | Yes | High | 21.6 | No  |             | TP53 p.P295fs; KRAS p.G12D                                            | TP53 p.P295fs  | 31  | Not detected | Negative | Not available | .             | .             | No | <0.5 |
| LCR 356 | No  | Low  | 24.4 | No  |             | CTNNB1 p.T41A; PIK3CA p.H1047R                                        | CTNNB1 p.T41A  | 26  | Not detected | Negative | .             | .             | .             | No | 1.5  |
| LCR 357 | No  | Low  | 23.2 | No  |             | APC p.E1464fs; TP53 p.R273C; ERBB3 p.V104L; NRAS p.G12D               | APC p.E1464fs  | 17  | Not detected | Negative | .             | .             | .             | No | 0.9  |
| LCR 358 | No  | Low  | 24.5 | No  |             | PIK3CA p.Q546R; APC p.R1450X; KRAS p.G12D                             | PIK3CA p.Q546R | 81  | Not detected | Negative | .             | .             | .             | No | <0.5 |
| LCR 389 | No  | Low  | 23.2 | No  |             | TP53 p.R196X                                                          | TP53 p.R196X   | 24  | Not detected | Negative | .             | .             | .             | No | 1.8  |
| LCR 390 | No  | Low  | 14.8 | No  |             | CTNNB1 p.S33P                                                         | CTNNB1 p.S33P  | 17  | Not detected | Negative | .             | .             | .             | No | 0.8  |
| LCR 391 | No  | Low  | 12.2 | No  |             | APC p.T1487fs; TP53 p.R248Q; NRAS p.G13D; APC p.Y1031X                | APC p.T1487fs  | 19  | Not detected | Negative | .             | .             | .             | No | 1.6  |
| LCR 392 | Yes | High | 13.6 | No  |             | APC p.E1309X; APC p.R1114X; TP53 p.R213Q; POLE p.V411L; PIK3CA p.E81K | APC p.E1309X   | 19  | Not detected | Negative | Not available | .             | .             | No | 2.0  |
| LCR 393 | Yes | High | 21.3 | No  |             | KRAS p.G12A; PIK3CA p.H1047R                                          | KRAS p.G12A    | 8.4 | Not detected | Negative | Negative      | .             | .             | No | 2.0  |
| LCR 394 | No  | High | 4.8  | Yes | Liver       | APC p.C1578fs; TP53 p.G245S; KRAS p.G12S                              | APC p.C1578fs  | 10  | 0.140        | Positive | .             | Positive      | 136           | No | 1.0  |
| LCR 395 | No  | Low  | 18.7 | No  |             | KRAS p.G12D; APC p.E1309X; APC p.A1485fs; PIK3CA p.E542K              | KRAS p.G12D    | 16  | 0.027        | Positive | .             | .             | .             | No | 2.9  |
| LCR 396 | No  | High | 17.8 | No  |             | TP53 p.K132E; APC p.E1145X                                            | TP53 p.K132E   | 19  | Not detected | Negative | .             | .             | .             | No | 0.7  |
| LCR 397 | No  | Low  | 12.5 | No  |             | APC p.P1319fs; TP53 p.R282W; PIK3CA p.C420R                           | APC p.P1319fs  | 27  | Not detected | Negative | .             | .             | .             | No | 0.6  |
| LCR 398 | No  | Low  | 7.3  | Yes | Lymph nodes | KRAS p.G12V                                                           | KRAS p.G12V    | 42  | 0.008        | Positive | .             | Positive      | 210           | No | 2.4  |
| LCR 399 | No  | Low  | 19.3 | No  |             | CTNNB1 p.S45P                                                         | CTNNB1 p.S45P  | 53  | Not detected | Negative | .             | .             | .             | No | 2.1  |
| LCR 400 | No  | Low  | 13.1 | No  |             | TP53 p.P151fs                                                         | TP53 p.P151fs  | 100 | 0.003        | Positive | .             | .             | .             | No | 2.1  |
| LCR 401 | No  | High | 11.8 | No  |             | APC p.E1306X; KRAS p.G12V                                             | APC p.E1306X   | 85  | Not detected | Negative | .             | .             | .             | No | 4.3  |
| LCR 402 | No  | Low  | 15.6 | No  |             | APC p.I1269fs; KRAS p.G12D; PIK3CA p.Q546K                            | APC p.I1269fs  | 100 | Not detected | Negative | .             | .             | .             | No | <1   |
| LCR 403 | No  | High | 11.0 | No  |             | APC p.S1436fs; TP53 g.7576928T>C (splice site); NRAS p.G13V           | APC p.S1436fs  | 17  | 0.046        | Positive | .             | .             | .             | No | 1.0  |
| LCR 404 | Yes | Low  | 11.8 | No  |             | APC p.E918X; TP53 p.R110L                                             | APC p.E918X    | 20  | Not detected | Negative | Not available | .             | .             | No | 1.0  |
| LCR 405 | No  | High | 13.5 | No  |             | APC p.D1285fs; TP53 p.C238F                                           | APC p.D1285fs  | 17  | Not detected | Negative | .             | .             | .             | No | 1.0  |
| LCR 406 | No  | High | 6.8  | Yes | Liver       | APC p.P1427fs; KRAS p.G13D; TP53 p.R175H; APC p.Q1062X                | APC p.P1427fs  | 20  | Not detected | Negative | .             | Not available | Not available | No | 0.5  |
| LCR 407 | No  | Low  | 18.7 | No  |             | APC p.S1104X                                                          | APC p.S1104X   | 21  | Not detected | Negative | .             | .             | .             | No | 1.2  |
| LCR 408 | No  | High | 13.1 | No  |             | POLE p.P286R; KRAS p.A146T; APC p.R1114X; APC p.S943X; PIK3CA p.E545K | POLE p.P286R   | 55  | Not detected | Negative | .             | .             | .             | No | 1.1  |

|         |     |      |      |     |                             |                                                                         |                 |    |              |          |          |               |                            |     |      |
|---------|-----|------|------|-----|-----------------------------|-------------------------------------------------------------------------|-----------------|----|--------------|----------|----------|---------------|----------------------------|-----|------|
| LCR 409 | Yes | Low  | 16.7 | Yes | Liver                       | TP53 p.R282W                                                            | TP53 p.R282W    | 57 | 1.774        | Positive | Positive | Positive      | 472                        | No  | 0.5  |
| LCR 410 | No  | Low  | 12.6 | No  |                             | BRAF p.V600E; TP53 p.W52X; PIK3CA p.E542K                               | BRAF p.V600E    | 28 | Not detected | Negative | .        | .             | .                          | No  | 2.5  |
| LCR 411 | No  | Low  | 19.5 | No  |                             | KRAS p.G12D                                                             | KRAS p.G12D     | 22 | Not detected | Negative | .        | .             | .                          | No  | 2.6  |
| LCR 412 | No  | Low  | 18.2 | No  |                             | TP53 p.Q167X; KRAS p.G12D; APC p.R787X; APC p.Q1411X                    | TP53 p.Q167X    | 92 | Not detected | Negative | .        | .             | .                          | No  | 1.7  |
| LCR 413 | No  | Low  | 13.4 | No  |                             | TP53 p.F328fs; KRAS p.G13D; APC p.S1374X; FBXW7 p.R347C                 | TP53 p.F328fs   | 20 | Not detected | Negative | .        | .             | .                          | No  | 2.6  |
| LCR 414 | Yes | High | 15.5 | No  |                             | APC p.D1178fs; KRAS p.G13D; TP53 p.N235D; APC p.H1375fs; PIK3CA p.E542K | APC p.D1178fs   | 78 | 0.007        | Positive | Negative | .             | .                          | No  | 0.7  |
| LCR 415 | Yes | High | 8.5  | Yes | Mesenteric nodal mass       | TP53 p.K381fs; APC p.K1462fs; APC p.R1450X; PIK3CA p.C420R              | TP53 p.K381fs   | 28 | Not detected | Negative | Negative | Negative      | Not detected at recurrence | Yes | 10.8 |
| LCR 416 | Yes | Low  | 15.4 | No  |                             | TP53 p.R248Q; APC p.E1309X                                              | TP53 p.R248Q    | 48 | Not detected | Negative | Positive | .             | .                          | No  | 1.7  |
| LCR 417 | Yes | High | 13.9 | No  |                             | APC p.L1488fs; TP53 p.R175H; KRAS p.G12V                                | APC p.L1488fs   | 36 | Not detected | Negative | Negative | .             | .                          | No  | 1.0  |
| LCR 419 | No  | Low  | 22.3 | No  |                             | APC p.Q1041fs; TP53 p.P190L; KRAS p.G12V                                | APC p.Q1041fs   | 31 | Not detected | Negative | .        | .             | .                          | No  | 2.0  |
| LCR 420 | No  | High | 16.3 | No  |                             | TP53 p.Y126D; APC p.R1450X                                              | TP53 p.Y126D    | 15 | Not detected | Negative | .        | .             | .                          | No  | 1.9  |
| LCR 421 | Yes | High | 21.0 | No  |                             | APC p.C995fs; POLE p.P286R                                              | APC p.C995fs    | 14 | Not detected | Negative | Negative | .             | .                          | No  | 2.3  |
| LCR 422 | No  | Low  | 21.7 | No  |                             | TP53 p.R273H                                                            | TP53 p.R273H    | 30 | Not detected | Negative | .        | .             | .                          | No  | 0.5  |
| LCR 423 | No  | Low  | 9.2  | Yes | Liver, omentum, anastomotic | KRAS p.G12S; TP53 p.R282W; PIK3CA p.E545K                               | KRAS p.G12S     | 10 | Not detected | Negative | .        | Positive      | 0                          | Yes | 6.3  |
| LCR 424 | No  | Low  | 17.4 | No  |                             | KRAS p.G12C                                                             | KRAS p.G12C     | 16 | Not detected | Negative | .        | .             | .                          | No  | 0.5  |
| LCR 425 | No  | High | 19.1 | No  |                             | TP53 p.Y327X; APC p.Q1303X; KRAS p.Q61H                                 | TP53 p.Y327X    | 74 | Not detected | Negative | .        | .             | .                          | No  | 1.2  |
| LCR 426 | No  | Low  | 17.7 | No  |                             | APC p.L1423fs; TP53 p.C275Y; PIK3CA p.R88Q                              | APC p.L1423fs   | 56 | Not detected | Negative | .        | .             | .                          | No  | 1.3  |
| LCR 427 | No  | Low  | 17.7 | No  |                             | PIK3CA p.H1047R; BRAF p.V600E                                           | PIK3CA p.H1047R | 31 | Not detected | Negative | .        | .             | .                          | No  | 1.0  |
| LCR 428 | No  | High | 5.9  | Yes | Peritoneal, omentum         | TP53 p.M66fs; KRAS p.Q61K                                               | TP53 p.M66fs    | 35 | Not detected | Negative | .        | Not available | Not available              | No  | 0.7  |
| LCR 429 | No  | Low  | 17.2 | No  |                             | APC p.T1493fs; TP53 p.R273C                                             | APC p.T1493fs   | 68 | Not detected | Negative | .        | .             | .                          | No  | 1.4  |
| LCR 430 | No  | Low  | 3.8  | No  |                             | PIK3CA p.H1047R; BRAF p.V600E                                           | PIK3CA p.H1047R | 38 | Not detected | Negative | .        | .             | .                          | No  | 0.5  |
| LCR 431 | No  | Low  | 4.6  | Yes | Liver                       | APC p.E1408fs; TP53 p.I232S                                             | APC p.E1408fs   | 19 | 0.046        | Positive | .        | Positive      | 99                         | No  | 2.9  |
| LCR 432 | No  | Low  | 13.7 | No  |                             | APC p.R876X; TP53 g.7578555C>T (splice site); KRAS p.G12D               | APC p.R876X     | 24 | Not detected | Negative | .        | .             | .                          | No  | 4.0  |
| LCR 433 | No  | Low  | 12.7 | No  |                             | BRAF p.V600E; APC p.T1556fs; PIK3CA p.C420R                             | BRAF p.V600E    | 23 | Not detected | Negative | .        | .             | .                          | No  | 2.0  |
| LCR 493 | No  | High | 11.4 | No  |                             | BRAF p.V600E; TP53 p.R43H                                               | BRAF p.V600E    | 18 | Not detected | Negative | .        | .             | .                          | No  | 1.2  |
| LCR 494 | No  | Low  | 10.9 | No  |                             | APC p.F1396fs                                                           | APC p.F1396fs   | 22 | Not detected | Negative | .        | .             | .                          | No  | 1.2  |

|         |     |      |      |     |       |                                                                                                          |                                             |     |              |          |               |          |     |               |               |
|---------|-----|------|------|-----|-------|----------------------------------------------------------------------------------------------------------|---------------------------------------------|-----|--------------|----------|---------------|----------|-----|---------------|---------------|
| LCR 495 | No  | Low  | 6.8  | Yes | Lung  | <i>TP53</i> p.I254fs; <i>KRAS</i> p.G12V; <i>APC</i> p.E1390X; <i>PIK3CA</i> p.E542K                     | <i>TP53</i> p.I254fs                        | 5.4 | 0.05         | Positive | .             | Positive | 181 | No            | 1.1           |
| LCR 497 | Yes | High | 8.9  | No  |       | <i>TP53</i> p.E217X; <i>KRAS</i> p.G12D                                                                  | <i>TP53</i> p.E217X                         | 21  | Not detected | Negative | Not available | .        | .   | No            | 1.0           |
| LCR 498 | No  | Low  | 10.5 | No  |       | <i>APC</i> p.P1319fs; <i>TP53</i> p.R43H; <i>KRAS</i> p.G12V                                             | <i>APC</i> p.P1319fs                        | 23  | Not detected | Negative | .             | .        | .   | No            | 1.0           |
| LCR 499 | No  | High | 10.6 | No  |       | <i>APC</i> p.L1488fs; <i>KRAS</i> p.G12C; <i>PIK3CA</i> Q546K                                            | <i>APC</i> p.L1488fs                        | 77  | Not detected | Negative | .             | .        | .   | No            | 1.5           |
| LCR 500 | No  | Low  | 10.0 | No  |       | <i>APC</i> p.T909fs; <i>KRAS</i> p.G12D; <i>APC</i> p.R1432X; <i>PIK3CA</i> p.E542K                      | <i>APC</i> p.T909fs                         | 78  | Not detected | Negative | .             | .        | .   | No            | 2.2           |
| LCR 501 | No  | Low  | 8.6  | No  |       | <i>BRAF</i> p.V600E; <i>AKT1</i> p.E17K                                                                  | <i>BRAF</i> p.V600E                         | 47  | Not detected | Negative | .             | .        | .   | No            | 3.0           |
| LCR 502 | Yes | High | 14.8 | No  |       | <i>APC</i> p.Q1406X; <i>APC</i> p.C1231X; <i>TP53</i> p.R141H                                            | <i>APC</i> p.Q1406X                         | 25  | Not detected | Negative | Not available | .        | .   | No            | 0.8           |
| LCR 503 | No  | Low  | 11.2 | No  |       | <i>RNF43</i> p.R657fs                                                                                    | <i>RNF43</i> p.R657fs                       | 40  | Not detected | Negative | .             | .        | .   | No            | 3.7           |
| LCR 504 | No  | Low  | 15.7 | No  |       | <i>CTNNB1</i> p.S45P; <i>TP53</i> p.R141C; <i>KRAS</i> p.G12D; <i>PIK3CA</i> p.H1047R                    | <i>CTNNB1</i> p.S45P                        | 21  | Not detected | Negative | .             | .        | .   | Not available | Not available |
| LCR 505 | No  | Low  | 15.4 | No  |       | <i>APC</i> p.K1363fs; <i>KRAS</i> p.G12C                                                                 | <i>APC</i> p.K1363fs                        | 64  | Not detected | Negative | .             | .        | .   | No            | 0.5           |
| LCR 506 | No  | High | 13.2 | No  |       | <i>APC</i> p.D1422fs; <i>TP53</i> p.R43H                                                                 | <i>APC</i> p.D1422fs                        | 24  | Not detected | Negative | .             | .        | .   | No            | 1.1           |
| LCR 507 | No  | High | 14.2 | Yes | Liver | <i>APC</i> p.S1010fs                                                                                     | <i>APC</i> p.S1010fs                        | 60  | 0.006        | Positive | .             | Positive | 381 | No            | 1.9           |
| LCR 508 | No  | Low  | 9.6  | No  |       | <i>RNF43</i> p.R657fs; <i>KRAS</i> p.Q61K                                                                | <i>RNF43</i> p.R657fs                       | 32  | Not detected | Negative | .             | .        | .   | No            | 2.6           |
| LCR 509 | No  | Low  | 10.7 | No  |       | <i>APC</i> p.R876X                                                                                       | <i>APC</i> p.R876X                          | 40  | Not detected | Negative | .             | .        | .   | No            | 1.0           |
| LCR 510 | No  | High | 9.4  | No  |       | <i>APC</i> p.N1255fs; <i>TP53</i> p.R141H                                                                | <i>APC</i> p.N1255fs                        | 56  | Not detected | Negative | .             | .        | .   | No            | 2.0           |
| LCR 511 | Yes | Low  | 5.2  | No  |       | <i>APC</i> p.P1526fs; <i>KRAS</i> p.G12V; <i>APC</i> p.E923X; <i>PIK3CA</i> p.E542K                      | <i>APC</i> p.P1526fs                        | 18  | Not detected | Negative | Not available | .        | .   | No            | 0.8           |
| LCR 521 | No  | Low  | 10.1 | No  |       | <i>TP53</i> p.R175H                                                                                      | <i>TP53</i> p.R175H                         | 12  | Not detected | Negative | .             | .        | .   | No            | 1.9           |
| LCR 522 | No  | Low  | 17.4 | No  |       | <i>BRAF</i> p.V 600E                                                                                     | <i>BRAF</i> p.V 600E                        | 36  | Not detected | Negative | .             | .        | .   | No            | 1.6           |
| LCR 523 | Yes | Low  | 10.2 | No  |       | <i>TP53</i> g.chr17:7577156C>T(splice site); <i>KRAS</i> p.G12V; <i>APC</i> p.Y917X; <i>APC</i> p.E1532X | <i>TP53</i> g.chr17:7577156C>T(splice site) | 84  | Not detected | Negative | Negative      | .        | .   | No            | 2.0           |

**Table S6. Panel of 15 genes used for identification of somatic mutations in tumor tissue.**

| <b>Gene</b>    | <b>Codons</b>                                                     |
|----------------|-------------------------------------------------------------------|
| <i>SMAD4</i>   | Entire coding region                                              |
| <i>TP53</i>    | Entire coding region                                              |
| <i>AKT1</i>    | Codons 10 to 30                                                   |
| <i>APC</i>     | Codons 789 to 1589                                                |
| <i>BRAF</i>    | Codons 582 to 605                                                 |
| <i>CTNNB1</i>  | Codons 20 to 46                                                   |
| <i>ERBB3</i>   | Codons 85 to 105                                                  |
| <i>FBXW7</i>   | Codons 448 to 461 and 474 to 510                                  |
| <i>HRAS</i>    | Codons 10 to 15                                                   |
| <i>KRAS</i>    | Codons 10 to 15, 51 to 63, and 120 to 130                         |
| <i>NRAS</i>    | Codons 10 to 15 and 51 to 63                                      |
| <i>PIK3CA</i>  | Codons 64 to 94, 316 to 346, 418 to 434, 527 to 560, 1002 to 1054 |
| <i>PPP2R1A</i> | Codons 176 to 198 and 250 to 275                                  |
| <i>RNF43</i>   | Codons 657 to 686                                                 |
| <i>POLE</i>    | Codons 279 to 303 and 410 to 414                                  |
